# Supplementary material for: Monotopic and heteroditopic calix[4]arene receptors as hosts for pyridinium and viologen ion pairs: a solution and solid-state study
Source: Royal Society of Chemistry journal article supplement (doi:10.1039/b906409e), 2009-01-01
Supplement: b906409e.pdf [file b906409e.pdf]

## Electronic Supplementary Information

### **Monotopic and Heteroditopic Calix[4]arene Receptors as Hosts for Pyridinium and Viologen Ion Pairs: a Solution and Solid State Study**

Luca Pescatori,<sup>a</sup> Arturo Arduini,<sup>a</sup> Andrea Pochini,<sup>a</sup> Andrea Secchi,<sup>\*a</sup>  
Chiara Massera,<sup>b</sup> and Franco Ugozzoli<sup>b</sup>

*a. Dipartimento di Chimica Organica e Industriale and Unità INSTM, Sez. 4 - UdR Parma, Università degli Studi di Parma, via G.P. Usberti 17/a, I-43100, Parma, Italy. Fax: +39 0521 905472; Tel: +39 0521 905409; E-mail: andrea.secchi@unipr.it*

*b. Dipartimento di Chimica Generale ed Inorganica, Chimica Analitica e Chimica Fisica, Università degli Studi di Parma, via G.P. Usberti 17/a, I-43100, Parma, Italy.*

## Solid state studies

**Table S1.** Conformational parameters<sup>1</sup>  $\phi$  and  $\chi$  and dihedral angles  $\delta$  for the complex **1**  $\supset$  NMPI

|     | $\phi$ (°) | $\chi$ (°) |     | $\delta$ (°) |
|-----|------------|------------|-----|--------------|
| A-B | 70.3(8)    | -85.3(7)   | A-R | 107.3(7)     |
| B-C | 88.8(7)    | -72.7(8)   | B-R | 123.4(8)     |
| C-D | 70.8(7)    | -85.5(7)   | C-R | 107.8(7)     |
| D-A | 87.3(8)    | -72.5(8)   | D-R | 123.2(8)     |

$\delta$  represent the dihedral angles between the least-squares planes through the phenolic rings and the molecular reference plane *R* (the least-squares plane through the four CH<sub>2</sub> bridging groups) according to the standard rules for calixarenes.<sup>2</sup>

**Table S2.** Conformational parameters<sup>1</sup>  $\phi$  and  $\chi$  for the complex **4**<sub>2</sub>  $\supset$  PQ(TsO)<sub>2</sub>

|     | $\phi$ (°) | $\chi$ (°) |
|-----|------------|------------|
| A-B | 96.0(4)    | -84.3(5)   |
| B-C | 71.9(4)    | -97.7(5)   |
| C-D | 103.4(5)   | -81.0(4)   |
| D-A | 65.3(4)    | -77.7(5)   |
| E-F | 80.2(4)    | -73.3(4)   |
| F-G | 89.2(5)    | -107.3(5)  |
| G-H | 93.7(4)    | -74.9(4)   |
| H-A | 87.7(5)    | -92.6(4)   |

<sup>1</sup> F. Ugozzoli and G.D. Andreotti, *J. Incl. Phen. and Mol. Rec. in Chem.*, 1992, **13**, 337

<sup>2</sup> M. Perrin and D. Oehler in *Calixarenes 2001*, Eds. Z. Asfari, V. Böhmer, J. Harrowfield and J Vicens, Kluwer Academic Publisher, Dordrecht, 2001, pp. 65-85.

## NMR Studies

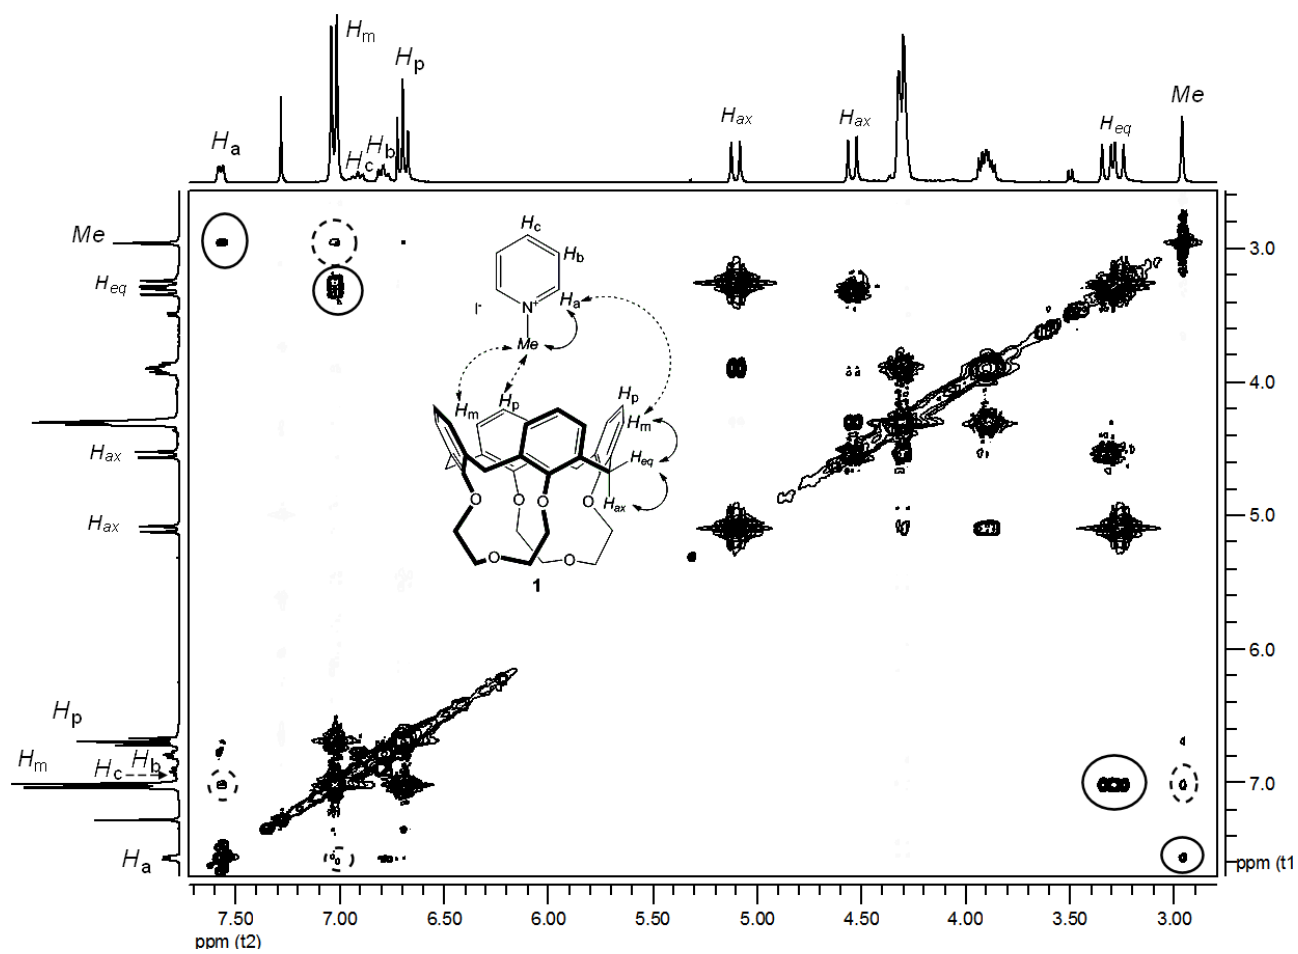

**Fig S1.** 2D NOESY spectrum ( $\text{CDCl}_3$ ,  $T=300$  K, mixing time = 0.4 ms) of a 2:1 mixture of **1** and NMPI. Intra- and intermolecular NOE cross-peaks are represented with continuous and dashed lines.

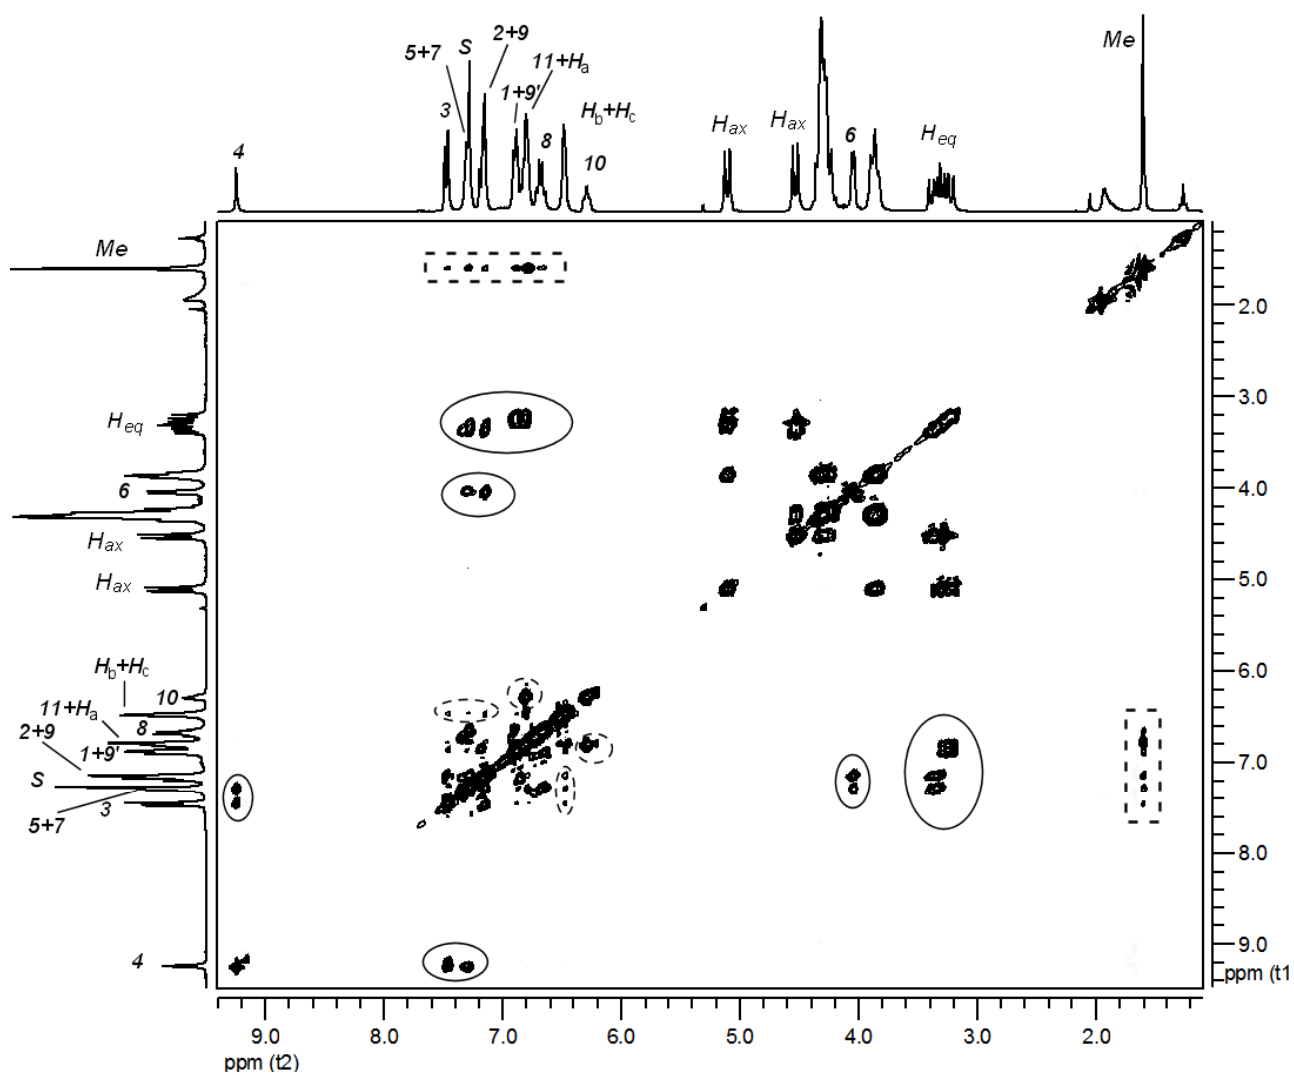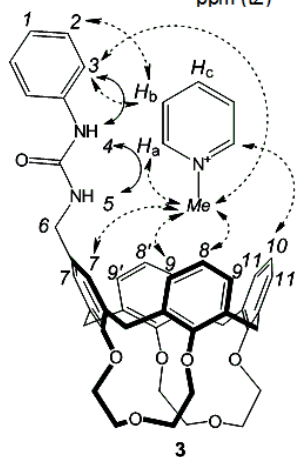

**Fig. S2.** 2D NOESY spectrum ( $\text{CDCl}_3$ ,  $T=300\text{ K}$ , mixing time = 0.4 ms) of a 1:1 mixture of **3** and NMP-Cl. Intra- and intermolecular NOE cross-peaks are represented with continuous and dashed lines.

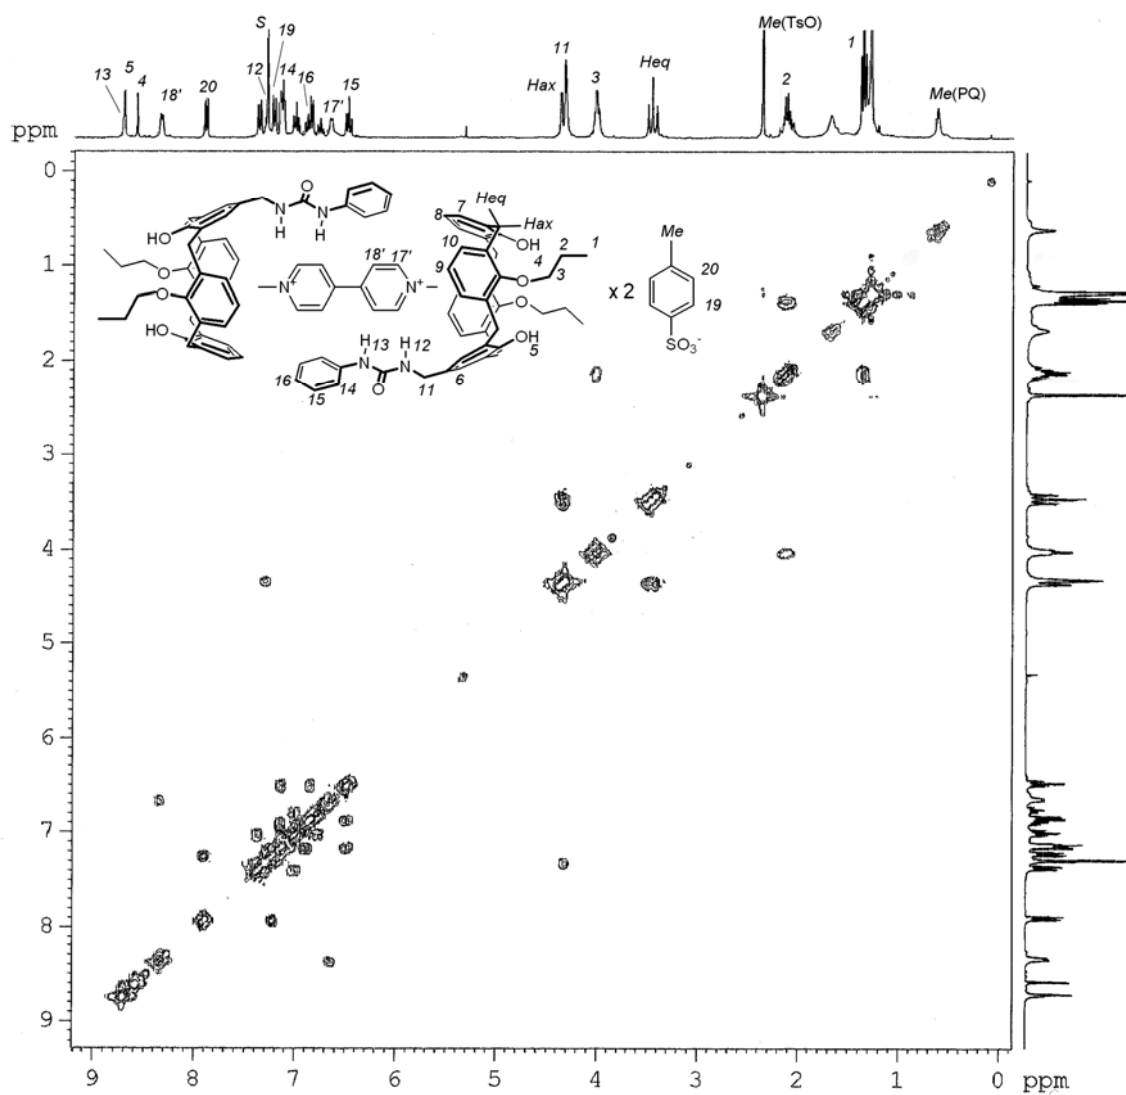

**Fig. S3.** 2D COSY spectrum ( $\text{CDCl}_3$ ,  $T=300$  K) of the 2:1 mixture of **4** and  $\text{PQ}(\text{TsO})_2$ .

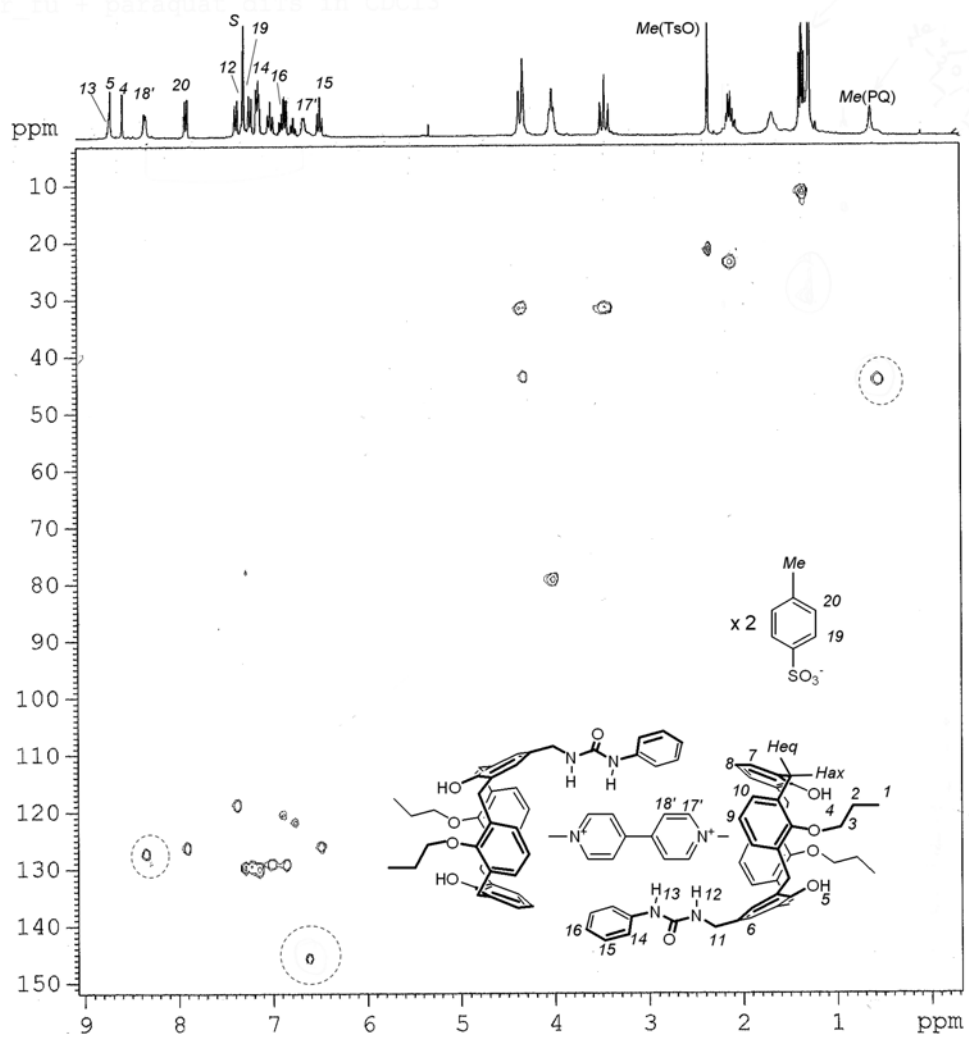

Fig. S4. 2D HMQC spectrum (CDCl<sub>3</sub>, T=300 K) of the 2:1 mixture of **4** and PQ(TsO)<sub>2</sub>.

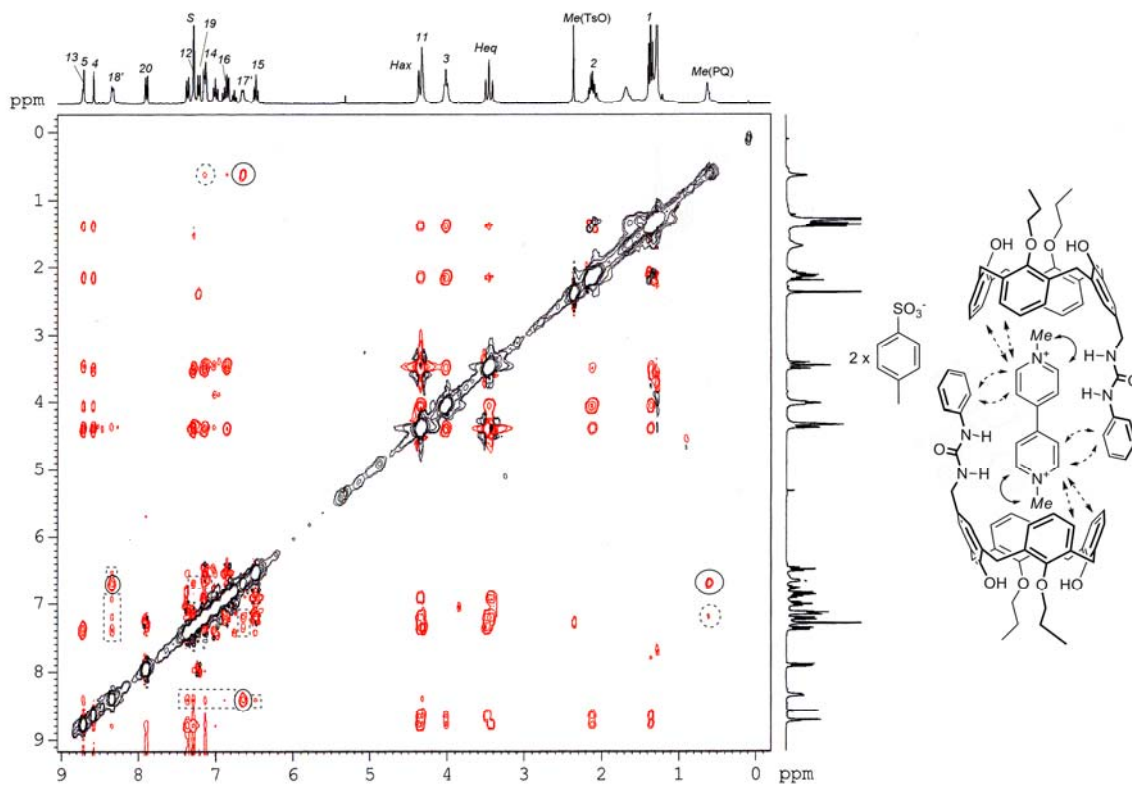

**Fig. S5** 2D ROESY spectrum ( $\text{CDCl}_3$ ,  $T=300\text{ K}$ , spin lock = 200 ms ) of the 2:1 mixture of **4** and  $\text{PQ}(\text{TsO})_2$ . The most representative NOE cross-peaks and the corresponding intra- and intermolecular connections have been evidenced in the spectrum with continuous and dashed lines and in the schematic representation of the complex with continuous and dashed arrows, respectively.

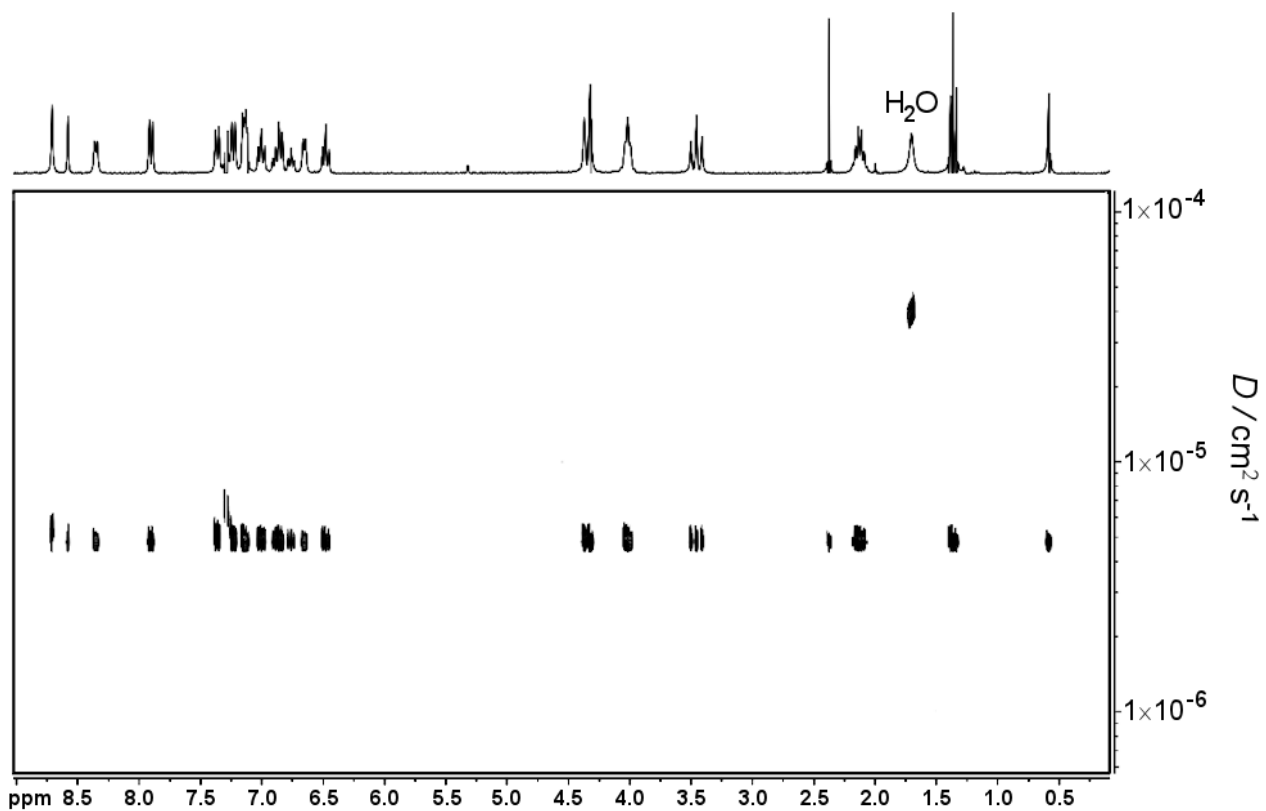

**Fig. S6** 2D DOSY spectrum (Experimental:  $\delta = 4$  ms,  $\Delta = 0.05$  s,  $T = 298$  K) of the 2:1 mixture in  $\text{CDCl}_3$  between **4** and  $\text{PQ}(\text{TsO})_2$  showing the presence of a single species diffusing in solution with  $D = 4.7 \pm 0.1 \times 10^{-6} \text{ cm}^2 \text{ s}^{-1}$ .
